# Supplementary material for: Catechol cross-linked antimicrobial peptide hydrogels prevent multidrug-resistant Acinetobacter baumannii infection in burn wounds
Source: PubMed Central journal article supplement (PMC6579981; doi:10.1042/bsr20190504), 2019-06-18
Supplement: bsr20190504_Supp1.pdf [file bsr20190504_Supp1.pdf]

**A**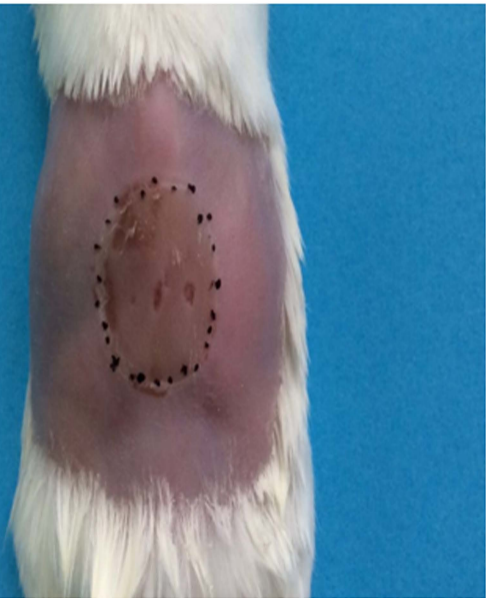**B**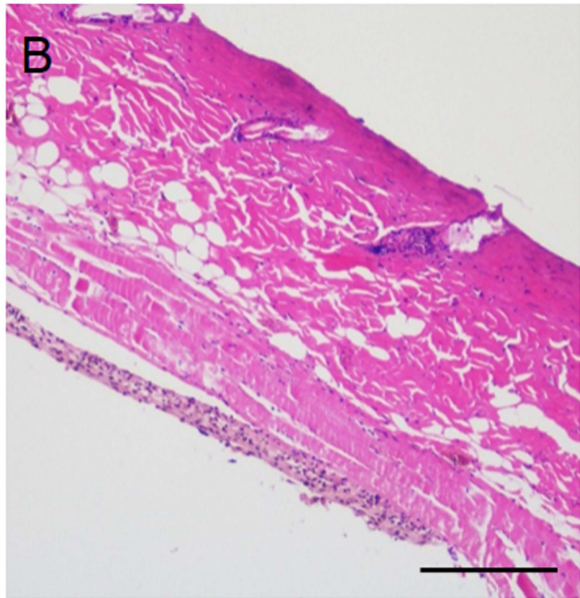

**A**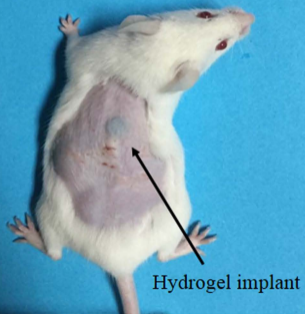**B**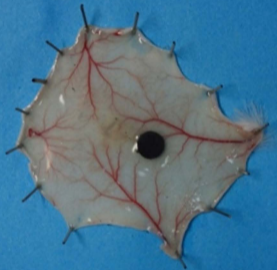**C**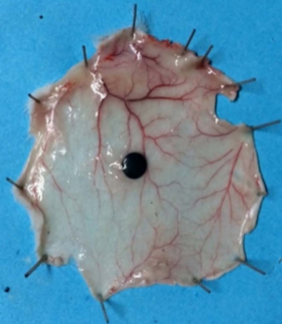

**A**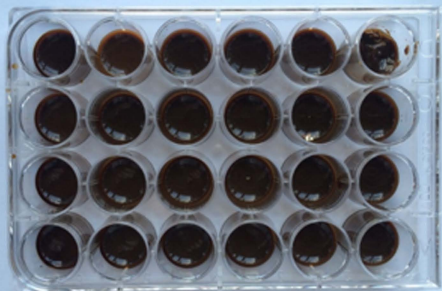**B**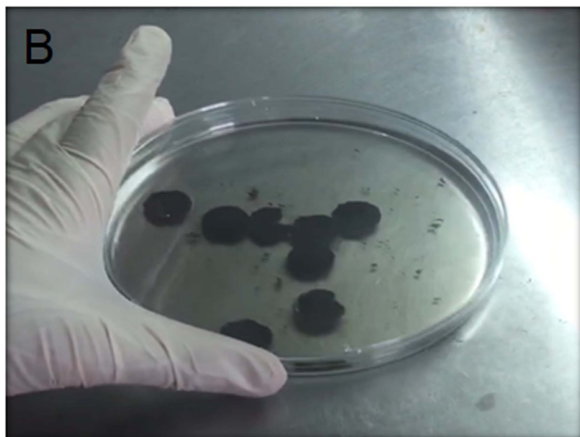**C**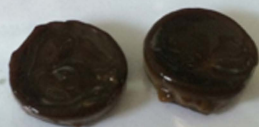**D**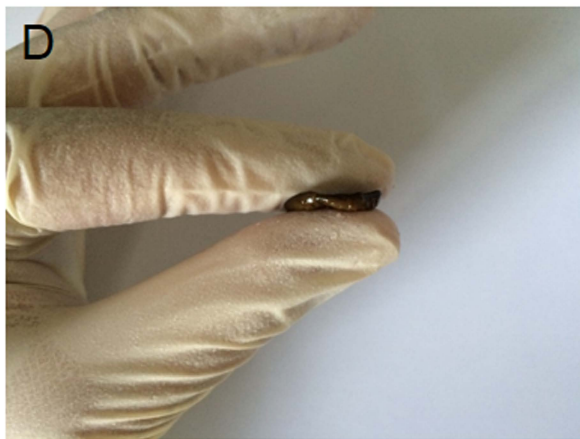

---

| Antibiotics              | Susceptibility |
|--------------------------|----------------|
| Ciprofloxacin            | R              |
| Levofloxacin             | I              |
| Ceftriaxone              | R              |
| Cefoperazone + Sulbactam | S              |
| Gentamicin               | R              |
| Meropenem                | R              |
| Tigecycline              | S              |
| Tobramycin               | R              |
| Compound trimethoprim    | R              |
| Trimethoprim             | R              |

---
